# Supplementary material for: TUBA1A mutations cause wide spectrum lissencephaly (smooth brain) and suggest that multiple neuronal migration pathways converge on alpha tubulins
Source: PubMed Central journal article supplement — Hum Mol Genet. 2010 May 12;19(14):2817–27. doi: 10.1093/hmg/ddq182 (PMC2893812; doi:10.1093/hmg/ddq182), 2010-05-12

## SUPPLEMENTARY DATA

### ***TUBA1A* mutations cause wide spectrum lissencephaly (smooth brain) and suggest that multiple neuronal migration pathways converge on alpha tubulins**

Ravinesh A. Kumar<sup>1</sup>, Daniela T. Pilz<sup>4</sup>, Timothy D. Babatz<sup>1</sup>, Thomas D. Cushion<sup>5</sup>, Kirsten Harvey<sup>6</sup>, Maya Topf<sup>7</sup>, Laura Yates<sup>8</sup>, Stephanie Robb<sup>9</sup>, Gökhan Uyanik<sup>10</sup>, Gracia M.S. Mancini<sup>11</sup>, Mark I. Rees<sup>4,5</sup>, Robert J. Harvey<sup>6</sup> and William B. Dobyns<sup>1-3\*</sup>

Departments of <sup>1</sup>Human Genetics, <sup>2</sup>Neurology, and <sup>3</sup>Pediatrics, University of Chicago, Chicago, IL 60637, USA; <sup>4</sup>Institute of Medical Genetics, University Hospital of Wales, Heath Park, Cardiff CF14 4XW, UK; <sup>5</sup>Institute of Life Science, School of Medicine, Swansea University, Singleton Park, SA2 8PP, United Kingdom; <sup>6</sup>Department of Pharmacology, The School of Pharmacy, London WC1N 1AX, UK; <sup>7</sup>Institute of Structural and Molecular Biology, Crystallography, Birkbeck College, University of London, Malet Street, London WC1E 7HX, United Kingdom; <sup>8</sup>Institute of Human Genetics, International Centre for Life, Newcastle upon Tyne, NE1 3NZ, UK; <sup>9</sup>The Dubowitz Neuromuscular Centre, Great Ormond Street Hospital, London, WC1N 3JN, UK; <sup>10</sup>Institute of Human Genetics, University Medical Center Hamburg-Eppendorf, Hamburg, Germany; <sup>11</sup>Department of Clinical Genetics, Erasmus University Medical Center, PO Box 2040. 3000CA Rotterdam, The Netherlands.

#### **\*Corresponding author:**

William B. Dobyns, M.D.  
Department of Human Genetics  
University of Chicago  
920 East 58th Street, CLSC 319  
Chicago, IL 60637  
Phone: 773-834-3597  
Fax: 773-834-8470  
Email: [wbd@bsd.uchicago.edu](mailto:wbd@bsd.uchicago.edu)

## **SUPPLEMENTARY FIGURE LEGENDS**

**Supplementary Figure 1.** Agenesis of the corpus callosum and cerebellar vermis hypoplasia without lissencephaly. The top row (A-E) shows a set of images from a normal 3-year-old girl to compare to all other brain images. The bottom row shows our single group 5 patient with a mildly "simplified" gyral pattern, which means that the number of gyri appears mildly reduced but with normal gyral width and cortical thickness. The key malformations seen in this child consist of total agenesis of the corpus callosum (down arrow in F), mildly enlarged tectum (arrowhead in F), thin brainstem with a very flat pons (horizontal arrow in F), and moderate cerebellar vermis hypoplasia (lower limit of vermis far above the horizontal white line in F). This pattern resembles our group 3 except for the lack of true LIS. These images come from normal control subject LR06-130 (A-E), and LR09-250 (F-J).

**Supplementary Figure 1.** Group 5 patient showing agenesis of the corpus callosum and cerebellar vermis hypoplasia without lissencephaly

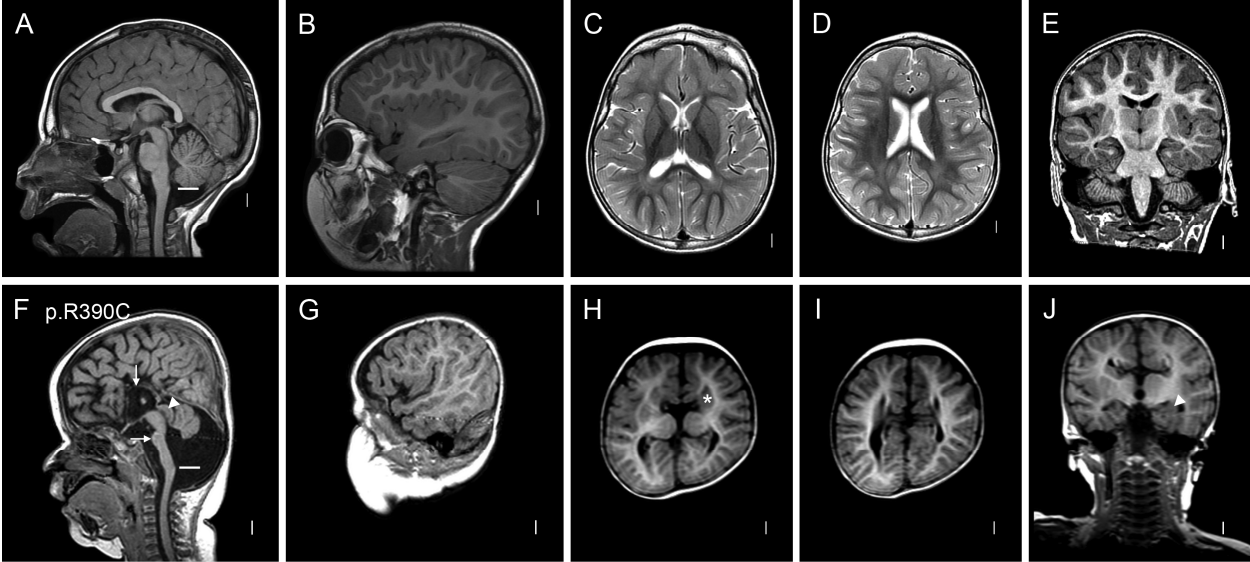

Supplement: ddq182_1.pdf [file ddq182_1.pdf]
